# Supplementary material
Source: publisher figshare collection journal article supplement (https://acs.figshare.com/ndownloader/files/12466097)
Supplement: Supplementary file 1 [file 12466097]

Compound_ID	SMILES	IC50 (¦ÌM), HCT-116 cells	IC50 (¦ÌM), K562 cells	IC50 (¦ÌM), HepG2 cells	IC50 (¦ÌM), SMMC-7721 cells
5a	O=C3C1=C2C(C=CC=C2N3CCCNCCCN)=CC=C1.Cl.Cl	16.95	11.5	>50	19.37
5b	O=C3C1=C2C(C=CC=C2N3CCCCNCCCCN)=CC=C1.Cl.Cl	>50	>50	>50	43.87
5c	O=C3C1=C2C(C=CC=C2N3CCCNCCCNCCCN)=CC=C1.Cl.Cl.Cl	12.02	26.07	14.59	19.36
5d	O=C3C1=C2C(C=CC=C2N3CCCNCCCCNCCCN)=CC=C1.Cl.Cl.Cl	11.12	28.71	25.44	26.08
5e	O=C3C1=C2C(C=CC=C2N3CCCCNCCCCNCCCCN)=CC=C1.Cl.Cl.Cl	5.72	12.03	5.28	13.47
11a	O=C3C1=C2C(C(NC(CNCCCCN)=O)=CC=C2N3CCCC)=CC=C1.Cl.Cl	>50	>50	>50	>50
11b	O=C3C1=C2C(C(NC(CNCCCNCCCN)=O)=CC=C2N3CCCC)=CC=C1.Cl.Cl.Cl	>50	>50	>50	>50
11c	O=C3C1=C2C(C(NC(CNCCCCNCCCCN)=O)=CC=C2N3CCCC)=CC=C1.Cl.Cl.Cl	>50	>50	21.93	23.27
11d	O=C3C1=C2C(C(NC(CNCCCNCCCNCCCN)=O)=CC=C2N3CCCC)=CC=C1.Cl.Cl.Cl.Cl	>50	>50	>50	>50
11e	O=C3C1=C2C(C(NC(CNCCCCNCCCCNCCCCN)=O)=CC=C2N3CCCC)=CC=C1.Cl.Cl.Cl.Cl	>50	>50	16.14	17.98
15a	O=C3C1=C2C(C(NCCCCN)=CC=C2N3CCCC)=CC=C1.Cl.Cl	16.93	>50	10.11	25.42
15b	O=C3C1=C2C(C(NCCCNCCCN)=CC=C2N3CCCC)=CC=C1.Cl.Cl.Cl	28.26	23.52	3.27	5.59
